# Supplementary material for: Molecular and morphological data reveal three new cryptic species of Chiasmocleis (Mehely 1904) (Anura, Microhylidae) endemic to the Atlantic Forest, Brazil
Source: PeerJ. 2017 Feb 21;5:e3005. doi: 10.7717/peerj.3005 (PMC5322761; doi:10.7717/peerj.3005)
Supplement: Supplemental Information 1 [file peerj-05-3005-s001.xlsx]

## Sheet: distances_matrix_16S.csv
ala_2682	ala_2682	ala_2683	alt_CTMZ1147	alt_CTMZ1172	cap_CTA1861	cap_CTA1863	cap_CTA1864	cap_CTA1865	cap_CTA1869	cap_CTA1870	cap_CTA1871	cap_CTA1872	cap_CTA1874	cap_CTA1875	cap_CTA1876	cap_CTA1877	cap_CTA1879	cap_CTA1881	cap_CTA1893	cap_CTA1894	cap_CTA1896	cap_CTMZ6907	cap_CTMZ6908	cap_CTMZ6912	cap_CTMZ6920	cap_CTMZ6921	cap_CTMZ6939	cap_MTR12076	cap_MTR12297	cor_CFBH15784	cor_CTA1935	cor_MTR22122	cor_MTR22123	cor_PEU137	cor_PEU146	cru_CTMZ6898	cru_CTMZ6900	cru_CTMZ6901	cru_MTR16070	lac_MNRJ47477	lac_MNRJ48415	lac_CFBH73	lac_CFBH7361	lac_CFBH76	lac_CTA1934	lac_CTMZ6946	lac_CTRN173	lac_CTRN174	lac_CTRN175
ala_2683	0
alt_CTMZ1147	0.09	0.09
alt_CTMZ1172	0.09	0.09	0
cap_CTA1861	0.059	0.059	0.107	0.107
cap_CTA1863	0.059	0.059	0.107	0.107	0
cap_CTA1864	0.059	0.059	0.107	0.107	0	0
cap_CTA1865	0.059	0.059	0.107	0.107	0	0	0
cap_CTA1869	0.059	0.059	0.107	0.107	0	0	0	0
cap_CTA1870	0.056	0.056	0.105	0.105	0.003	0.003	0.003	0.003	0.003
cap_CTA1871	0.059	0.059	0.107	0.107	0	0	0	0	0	0.003
cap_CTA1872	0.056	0.056	0.105	0.105	0.003	0.003	0.003	0.003	0.003	0	0.003
cap_CTA1874	0.056	0.056	0.105	0.105	0.003	0.003	0.003	0.003	0.003	0	0.003	0
cap_CTA1875	0.056	0.056	0.105	0.105	0.003	0.003	0.003	0.003	0.003	0	0.003	0	0
cap_CTA1876	0.056	0.056	0.105	0.105	0.003	0.003	0.003	0.003	0.003	0	0.003	0	0	0
cap_CTA1877	0.056	0.056	0.105	0.105	0.003	0.003	0.003	0.003	0.003	0	0.003	0	0	0	0
cap_CTA1879	0.056	0.056	0.105	0.105	0.003	0.003	0.003	0.003	0.003	0	0.003	0	0	0	0	0
cap_CTA1881	0.056	0.056	0.105	0.105	0.003	0.003	0.003	0.003	0.003	0	0.003	0	0	0	0	0	0
cap_CTA1893	0.056	0.056	0.105	0.105	0.003	0.003	0.003	0.003	0.003	0	0.003	0	0	0	0	0	0	0
cap_CTA1894	0.056	0.056	0.105	0.105	0.003	0.003	0.003	0.003	0.003	0	0.003	0	0	0	0	0	0	0	0
cap_CTA1896	0.056	0.056	0.105	0.105	0.003	0.003	0.003	0.003	0.003	0	0.003	0	0	0	0	0	0	0	0	0
cap_CTMZ6907	0.056	0.056	0.105	0.105	0.003	0.003	0.003	0.003	0.003	0	0.003	0	0	0	0	0	0	0	0	0	0
cap_CTMZ6908	0.056	0.056	0.105	0.105	0.003	0.003	0.003	0.003	0.003	0	0.003	0	0	0	0	0	0	0	0	0	0	0
cap_CTMZ6912	0.056	0.056	0.105	0.105	0.003	0.003	0.003	0.003	0.003	0	0.003	0	0	0	0	0	0	0	0	0	0	0	0
cap_CTMZ6920	0.056	0.056	0.105	0.105	0.003	0.003	0.003	0.003	0.003	0	0.003	0	0	0	0	0	0	0	0	0	0	0	0	0
cap_CTMZ6921	0.056	0.056	0.105	0.105	0.003	0.003	0.003	0.003	0.003	0	0.003	0	0	0	0	0	0	0	0	0	0	0	0	0	0
cap_CTMZ6939	0.059	0.059	0.107	0.107	0.003	0.003	0.003	0.003	0.003	0.006	0.003	0.006	0.006	0.006	0.006	0.006	0.006	0.006	0.006	0.006	0.006	0.006	0.006	0.006	0.006	0.006
cap_MTR12076	0.056	0.056	0.105	0.105	0.003	0.003	0.003	0.003	0.003	0	0.003	0	0	0	0	0	0	0	0	0	0	0	0	0	0	0	0.006
cap_MTR12297	0.056	0.056	0.105	0.105	0.003	0.003	0.003	0.003	0.003	0	0.003	0	0	0	0	0	0	0	0	0	0	0	0	0	0	0	0.006	0
cor_CFBH15784	0.015	0.015	0.093	0.093	0.047	0.047	0.047	0.047	0.047	0.044	0.047	0.044	0.044	0.044	0.044	0.044	0.044	0.044	0.044	0.044	0.044	0.044	0.044	0.044	0.044	0.044	0.047	0.044	0.044
cor_CTA1935	0.018	0.018	0.093	0.093	0.056	0.056	0.056	0.056	0.056	0.053	0.056	0.053	0.053	0.053	0.053	0.053	0.053	0.053	0.053	0.053	0.053	0.053	0.053	0.053	0.053	0.053	0.056	0.053	0.053	0.009
cor_MTR22122	0.015	0.015	0.093	0.093	0.053	0.053	0.053	0.053	0.053	0.05	0.053	0.05	0.05	0.05	0.05	0.05	0.05	0.05	0.05	0.05	0.05	0.05	0.05	0.05	0.05	0.05	0.053	0.05	0.05	0.006	0.003
cor_MTR22123	0.015	0.015	0.093	0.093	0.053	0.053	0.053	0.053	0.053	0.05	0.053	0.05	0.05	0.05	0.05	0.05	0.05	0.05	0.05	0.05	0.05	0.05	0.05	0.05	0.05	0.05	0.053	0.05	0.05	0.006	0.003	0
cor_PEU137	0.02	0.02	0.099	0.099	0.059	0.059	0.059	0.059	0.059	0.056	0.059	0.056	0.056	0.056	0.056	0.056	0.056	0.056	0.056	0.056	0.056	0.056	0.056	0.056	0.056	0.056	0.059	0.056	0.056	0.012	0.009	0.006	0.006
cor_PEU146	0.018	0.018	0.096	0.096	0.056	0.056	0.056	0.056	0.056	0.053	0.056	0.053	0.053	0.053	0.053	0.053	0.053	0.053	0.053	0.053	0.053	0.053	0.053	0.053	0.053	0.053	0.056	0.053	0.053	0.009	0.006	0.003	0.003	0.009
cru_CTMZ6898	0.026	0.026	0.096	0.096	0.05	0.05	0.05	0.05	0.05	0.047	0.05	0.047	0.047	0.047	0.047	0.047	0.047	0.047	0.047	0.047	0.047	0.047	0.047	0.047	0.047	0.047	0.05	0.047	0.047	0.012	0.02	0.018	0.018	0.018	0.02
cru_CTMZ6900	0.026	0.026	0.101	0.101	0.056	0.056	0.056	0.056	0.056	0.053	0.056	0.053	0.053	0.053	0.053	0.053	0.053	0.053	0.053	0.053	0.053	0.053	0.053	0.053	0.053	0.053	0.056	0.053	0.053	0.018	0.026	0.023	0.023	0.023	0.026	0.006
cru_CTMZ6901	0.029	0.029	0.099	0.099	0.053	0.053	0.053	0.053	0.053	0.05	0.053	0.05	0.05	0.05	0.05	0.05	0.05	0.05	0.05	0.05	0.05	0.05	0.05	0.05	0.05	0.05	0.053	0.05	0.05	0.015	0.023	0.02	0.021	0.02	0.023	0.003	0.003
cru_MTR16070	0.035	0.035	0.104	0.104	0.059	0.059	0.059	0.059	0.059	0.056	0.059	0.056	0.056	0.056	0.056	0.056	0.056	0.056	0.056	0.056	0.056	0.056	0.056	0.056	0.056	0.056	0.059	0.056	0.056	0.02	0.029	0.026	0.026	0.026	0.029	0.009	0.009	0.006
lac_MNRJ47477	0.05	0.05	0.101	0.101	0.012	0.012	0.012	0.012	0.012	0.009	0.012	0.009	0.009	0.009	0.009	0.009	0.009	0.009	0.009	0.009	0.009	0.009	0.009	0.009	0.009	0.009	0.015	0.009	0.009	0.038	0.047	0.044	0.044	0.05	0.047	0.041	0.047	0.044	0.05
lac_MNRJ48415	0.05	0.05	0.101	0.101	0.012	0.012	0.012	0.012	0.012	0.009	0.012	0.009	0.009	0.009	0.009	0.009	0.009	0.009	0.009	0.009	0.009	0.009	0.009	0.009	0.009	0.009	0.015	0.009	0.009	0.038	0.047	0.044	0.044	0.05	0.047	0.041	0.047	0.044	0.05	0
lac_CFBH73	0.053	0.053	0.104	0.104	0.015	0.015	0.015	0.015	0.015	0.012	0.015	0.012	0.012	0.012	0.012	0.012	0.012	0.012	0.012	0.012	0.012	0.012	0.012	0.012	0.012	0.012	0.018	0.012	0.012	0.041	0.05	0.047	0.047	0.053	0.05	0.044	0.05	0.047	0.053	0.003	0.003
lac_CFBH7361	0.047	0.047	0.104	0.104	0.015	0.015	0.015	0.015	0.015	0.012	0.015	0.012	0.012	0.012	0.012	0.012	0.012	0.012	0.012	0.012	0.012	0.012	0.012	0.012	0.012	0.012	0.018	0.012	0.012	0.035	0.044	0.041	0.041	0.047	0.044	0.038	0.044	0.041	0.047	0.003	0.003	0.006
lac_CFBH76	0.053	0.053	0.104	0.104	0.015	0.015	0.015	0.015	0.015	0.012	0.015	0.012	0.012	0.012	0.012	0.012	0.012	0.012	0.012	0.012	0.012	0.012	0.012	0.012	0.012	0.012	0.018	0.012	0.012	0.041	0.05	0.047	0.047	0.053	0.05	0.044	0.05	0.047	0.053	0.003	0.003	0	0.006
lac_CTA1934	0.062	0.062	0.11	0.11	0.015	0.015	0.015	0.015	0.015	0.012	0.015	0.012	0.012	0.012	0.012	0.012	0.012	0.012	0.012	0.012	0.012	0.012	0.012	0.012	0.012	0.012	0.018	0.012	0.012	0.05	0.059	0.056	0.056	0.062	0.059	0.053	0.059	0.056	0.062	0.015	0.015	0.018	0.018	0.018
lac_CTMZ6946	0.047	0.047	0.104	0.104	0.015	0.015	0.015	0.015	0.015	0.012	0.015	0.012	0.012	0.012	0.012	0.012	0.012	0.012	0.012	0.012	0.012	0.012	0.012	0.012	0.012	0.012	0.018	0.012	0.012	0.035	0.044	0.041	0.041	0.047	0.044	0.038	0.044	0.041	0.047	0.003	0.003	0.006	0	0.006	0.018
lac_CTRN173	0.053	0.053	0.101	0.101	0.015	0.015	0.015	0.015	0.015	0.012	0.015	0.012	0.012	0.012	0.012	0.012	0.012	0.012	0.012	0.012	0.012	0.012	0.012	0.012	0.012	0.012	0.018	0.012	0.012	0.041	0.05	0.047	0.047	0.053	0.05	0.044	0.05	0.047	0.053	0.003	0.003	0.006	0.006	0.006	0.018	0.006
lac_CTRN174	0.053	0.053	0.101	0.101	0.015	0.015	0.015	0.015	0.015	0.012	0.015	0.012	0.012	0.012	0.012	0.012	0.012	0.012	0.012	0.012	0.012	0.012	0.012	0.012	0.012	0.012	0.018	0.012	0.012	0.041	0.05	0.047	0.047	0.053	0.05	0.044	0.05	0.047	0.053	0.003	0.003	0.006	0.006	0.006	0.018	0.006	0
lac_CTRN175	0.053	0.053	0.101	0.101	0.015	0.015	0.015	0.015	0.015	0.012	0.015	0.012	0.012	0.012	0.012	0.012	0.012	0.012	0.012	0.012	0.012	0.012	0.012	0.012	0.012	0.012	0.018	0.012	0.012	0.041	0.05	0.047	0.047	0.053	0.05	0.044	0.05	0.047	0.053	0.003	0.003	0.006	0.006	0.006	0.018	0.006	0	0
lac_MNRJ49302	0.062	0.062	0.107	0.107	0.023	0.024	0.024	0.023	0.024	0.021	0.024	0.021	0.021	0.021	0.021	0.021	0.021	0.021	0.021	0.021	0.021	0.021	0.021	0.021	0.021	0.021	0.026	0.021	0.021	0.05	0.059	0.056	0.056	0.062	0.059	0.047	0.053	0.05	0.056	0.012	0.012	0.015	0.015	0.015	0.026	0.015	0.015	0.015	0.015
lac_MNRJ66494	0.062	0.062	0.11	0.11	0.015	0.015	0.015	0.015	0.015	0.012	0.015	0.012	0.012	0.012	0.012	0.012	0.012	0.012	0.012	0.012	0.012	0.012	0.012	0.012	0.012	0.012	0.018	0.012	0.012	0.05	0.059	0.056	0.056	0.062	0.059	0.053	0.059	0.056	0.062	0.015	0.015	0.018	0.018	0.018	0	0.018	0.018	0.018	0.018
leu_CFBH8594	0.081	0.081	0.069	0.069	0.084	0.084	0.084	0.084	0.084	0.087	0.084	0.087	0.087	0.087	0.087	0.087	0.087	0.087	0.087	0.087	0.087	0.087	0.087	0.087	0.087	0.087	0.084	0.087	0.087	0.084	0.09	0.09	0.09	0.09	0.093	0.081	0.081	0.084	0.09	0.087	0.087	0.09	0.09	0.09	0.096	0.09	0.087	0.087	0.087
leu_CTMZ2485	0.081	0.081	0.069	0.069	0.084	0.084	0.084	0.084	0.084	0.087	0.084	0.087	0.087	0.087	0.087	0.087	0.087	0.087	0.087	0.087	0.087	0.087	0.087	0.087	0.087	0.087	0.084	0.087	0.087	0.084	0.09	0.09	0.09	0.09	0.093	0.081	0.081	0.084	0.09	0.087	0.087	0.09	0.09	0.09	0.096	0.09	0.087	0.087	0.087
leu_CTMZ2497	0.081	0.081	0.069	0.069	0.084	0.084	0.084	0.084	0.084	0.087	0.084	0.087	0.087	0.087	0.087	0.087	0.087	0.087	0.087	0.087	0.087	0.087	0.087	0.087	0.087	0.087	0.084	0.087	0.087	0.084	0.09	0.09	0.09	0.09	0.093	0.081	0.081	0.084	0.09	0.087	0.087	0.09	0.09	0.09	0.096	0.09	0.087	0.087	0.087
man_CTMZ6891	0.095	0.095	0.006	0.006	0.107	0.107	0.107	0.107	0.107	0.104	0.107	0.104	0.104	0.104	0.104	0.104	0.104	0.104	0.104	0.104	0.104	0.104	0.104	0.104	0.104	0.104	0.107	0.104	0.104	0.098	0.098	0.098	0.098	0.104	0.101	0.101	0.107	0.104	0.11	0.107	0.107	0.11	0.11	0.11	0.11	0.11	0.107	0.107	0.107
man_UFMGt1802	0.098	0.098	0.012	0.012	0.11	0.11	0.11	0.11	0.11	0.107	0.11	0.107	0.107	0.107	0.107	0.107	0.107	0.107	0.107	0.107	0.107	0.107	0.107	0.107	0.107	0.107	0.11	0.107	0.107	0.101	0.101	0.101	0.101	0.107	0.104	0.104	0.11	0.107	0.113	0.11	0.11	0.113	0.113	0.113	0.107	0.113	0.11	0.11	0.11
man_UFMGt1804	0.098	0.098	0.012	0.012	0.11	0.11	0.11	0.11	0.11	0.107	0.11	0.107	0.107	0.107	0.107	0.107	0.107	0.107	0.107	0.107	0.107	0.107	0.107	0.107	0.107	0.107	0.11	0.107	0.107	0.101	0.101	0.101	0.101	0.107	0.104	0.104	0.11	0.107	0.113	0.11	0.11	0.113	0.113	0.113	0.107	0.113	0.11	0.11	0.11
man_UFMGt1810	0.098	0.098	0.012	0.012	0.11	0.11	0.11	0.11	0.11	0.107	0.11	0.107	0.107	0.107	0.107	0.107	0.107	0.107	0.107	0.107	0.107	0.107	0.107	0.107	0.107	0.107	0.11	0.107	0.107	0.101	0.101	0.101	0.101	0.107	0.104	0.104	0.11	0.107	0.113	0.11	0.11	0.113	0.113	0.113	0.107	0.113	0.11	0.11	0.11
man_UFMGt1815	0.098	0.098	0.012	0.012	0.11	0.11	0.11	0.11	0.11	0.107	0.11	0.107	0.107	0.107	0.107	0.107	0.107	0.107	0.107	0.107	0.107	0.107	0.107	0.107	0.107	0.107	0.11	0.107	0.107	0.101	0.101	0.101	0.101	0.107	0.104	0.104	0.11	0.107	0.113	0.11	0.11	0.113	0.113	0.113	0.107	0.113	0.11	0.11	0.11
qui_CFBH1437	0.05	0.05	0.101	0.101	0.012	0.012	0.012	0.012	0.012	0.009	0.012	0.009	0.009	0.009	0.009	0.009	0.009	0.009	0.009	0.009	0.009	0.009	0.009	0.009	0.009	0.009	0.015	0.009	0.009	0.038	0.047	0.044	0.044	0.05	0.047	0.041	0.047	0.044	0.05	0.006	0.006	0.009	0.009	0.009	0.015	0.009	0.009	0.009	0.009
qui_CFBH1438	0.05	0.05	0.101	0.101	0.012	0.012	0.012	0.012	0.012	0.009	0.012	0.009	0.009	0.009	0.009	0.009	0.009	0.009	0.009	0.009	0.009	0.009	0.009	0.009	0.009	0.009	0.015	0.009	0.009	0.038	0.047	0.044	0.044	0.05	0.047	0.041	0.047	0.044	0.05	0.006	0.006	0.009	0.009	0.009	0.015	0.009	0.009	0.009	0.009
qui_CFBH9055	0.05	0.05	0.101	0.101	0.012	0.012	0.012	0.012	0.012	0.009	0.012	0.009	0.009	0.009	0.009	0.009	0.009	0.009	0.009	0.009	0.009	0.009	0.009	0.009	0.009	0.009	0.015	0.009	0.009	0.038	0.047	0.044	0.044	0.05	0.047	0.041	0.047	0.044	0.05	0.006	0.006	0.009	0.009	0.009	0.015	0.009	0.009	0.009	0.009
qui_CFBH9082	0.05	0.05	0.101	0.101	0.012	0.012	0.012	0.012	0.012	0.009	0.012	0.009	0.009	0.009	0.009	0.009	0.009	0.009	0.009	0.009	0.009	0.009	0.009	0.009	0.009	0.009	0.015	0.009	0.009	0.038	0.047	0.044	0.044	0.05	0.047	0.041	0.047	0.044	0.05	0.006	0.006	0.009	0.009	0.009	0.015	0.009	0.009	0.009	0.009
qui_CFBH9083	0.05	0.05	0.101	0.101	0.012	0.012	0.012	0.012	0.012	0.009	0.012	0.009	0.009	0.009	0.009	0.009	0.009	0.009	0.009	0.009	0.009	0.009	0.009	0.009	0.009	0.009	0.015	0.009	0.009	0.038	0.047	0.044	0.044	0.05	0.047	0.041	0.047	0.044	0.05	0.006	0.006	0.009	0.009	0.009	0.015	0.009	0.009	0.009	0.009
qui_CTA1906	0.05	0.05	0.101	0.101	0.012	0.012	0.012	0.012	0.012	0.009	0.012	0.009	0.009	0.009	0.009	0.009	0.009	0.009	0.009	0.009	0.009	0.009	0.009	0.009	0.009	0.009	0.015	0.009	0.009	0.038	0.047	0.044	0.044	0.05	0.047	0.041	0.047	0.044	0.05	0.006	0.006	0.009	0.009	0.009	0.015	0.009	0.009	0.009	0.009
qui_CTA1907	0.05	0.05	0.099	0.099	0.015	0.015	0.015	0.015	0.015	0.012	0.015	0.012	0.012	0.012	0.012	0.012	0.012	0.012	0.012	0.012	0.012	0.012	0.012	0.012	0.012	0.012	0.018	0.012	0.012	0.038	0.047	0.044	0.044	0.05	0.047	0.041	0.047	0.044	0.05	0.009	0.009	0.012	0.012	0.012	0.018	0.012	0.012	0.012	0.012
qui_CTA1908	0.05	0.05	0.101	0.101	0.012	0.012	0.012	0.012	0.012	0.009	0.012	0.009	0.009	0.009	0.009	0.009	0.009	0.009	0.009	0.009	0.009	0.009	0.009	0.009	0.009	0.009	0.015	0.009	0.009	0.038	0.047	0.044	0.044	0.05	0.047	0.041	0.047	0.044	0.05	0.006	0.006	0.009	0.009	0.009	0.015	0.009	0.009	0.009	0.009
qui_CTA1909	0.05	0.05	0.101	0.101	0.012	0.012	0.012	0.012	0.012	0.009	0.012	0.009	0.009	0.009	0.009	0.009	0.009	0.009	0.009	0.009	0.009	0.009	0.009	0.009	0.009	0.009	0.015	0.009	0.009	0.038	0.047	0.044	0.044	0.05	0.047	0.041	0.047	0.044	0.05	0.006	0.006	0.009	0.009	0.009	0.015	0.009	0.009	0.009	0.009
qui_CTA1918	0.05	0.05	0.101	0.101	0.012	0.012	0.012	0.012	0.012	0.009	0.012	0.009	0.009	0.009	0.009	0.009	0.009	0.009	0.009	0.009	0.009	0.009	0.009	0.009	0.009	0.009	0.015	0.009	0.009	0.038	0.047	0.044	0.044	0.05	0.047	0.041	0.047	0.044	0.05	0.006	0.006	0.009	0.009	0.009	0.015	0.009	0.009	0.009	0.009
qui_CTA1919	0.05	0.05	0.101	0.101	0.012	0.012	0.012	0.012	0.012	0.009	0.012	0.009	0.009	0.009	0.009	0.009	0.009	0.009	0.009	0.009	0.009	0.009	0.009	0.009	0.009	0.009	0.015	0.009	0.009	0.038	0.047	0.044	0.044	0.05	0.047	0.041	0.047	0.044	0.05	0.006	0.006	0.009	0.009	0.009	0.015	0.009	0.009	0.009	0.009
qui_CTA1923	0.05	0.05	0.101	0.101	0.012	0.012	0.012	0.012	0.012	0.009	0.012	0.009	0.009	0.009	0.009	0.009	0.009	0.009	0.009	0.009	0.009	0.009	0.009	0.009	0.009	0.009	0.015	0.009	0.009	0.038	0.047	0.044	0.044	0.05	0.047	0.041	0.047	0.044	0.05	0.006	0.006	0.009	0.009	0.009	0.015	0.009	0.009	0.009	0.009
qui_CTA1929	0.05	0.05	0.101	0.101	0.012	0.012	0.012	0.012	0.012	0.009	0.012	0.009	0.009	0.009	0.009	0.009	0.009	0.009	0.009	0.009	0.009	0.009	0.009	0.009	0.009	0.009	0.015	0.009	0.009	0.038	0.047	0.044	0.044	0.05	0.047	0.041	0.047	0.044	0.05	0.006	0.006	0.009	0.009	0.009	0.015	0.009	0.009	0.009	0.009
qui_CTA1931	0.05	0.05	0.101	0.101	0.012	0.012	0.012	0.012	0.012	0.009	0.012	0.009	0.009	0.009	0.009	0.009	0.009	0.009	0.009	0.009	0.009	0.009	0.009	0.009	0.009	0.009	0.015	0.009	0.009	0.038	0.047	0.044	0.044	0.05	0.047	0.041	0.047	0.044	0.05	0.006	0.006	0.009	0.009	0.009	0.015	0.009	0.009	0.009	0.009
qui_CTA1933	0.05	0.05	0.101	0.101	0.012	0.012	0.012	0.012	0.012	0.009	0.012	0.009	0.009	0.009	0.009	0.009	0.009	0.009	0.009	0.009	0.009	0.009	0.009	0.009	0.009	0.009	0.015	0.009	0.009	0.038	0.047	0.044	0.044	0.05	0.047	0.041	0.047	0.044	0.05	0.006	0.006	0.009	0.009	0.009	0.015	0.009	0.009	0.009	0.009
qui_CTA1938	0.05	0.05	0.099	0.099	0.015	0.015	0.015	0.015	0.015	0.012	0.015	0.012	0.012	0.012	0.012	0.012	0.012	0.012	0.012	0.012	0.012	0.012	0.012	0.012	0.012	0.012	0.015	0.012	0.012	0.038	0.047	0.044	0.044	0.05	0.047	0.041	0.047	0.044	0.05	0.009	0.009	0.012	0.012	0.012	0.018	0.012	0.012	0.012	0.012
qui_CTMZ6903	0.047	0.047	0.104	0.104	0.015	0.015	0.015	0.015	0.015	0.012	0.015	0.012	0.012	0.012	0.012	0.012	0.012	0.012	0.012	0.012	0.012	0.012	0.012	0.012	0.012	0.012	0.018	0.012	0.012	0.035	0.044	0.041	0.041	0.047	0.044	0.038	0.044	0.041	0.047	0.009	0.009	0.012	0.006	0.012	0.018	0.006	0.012	0.012	0.012
qui_CTMZ6905	0.053	0.053	0.104	0.104	0.015	0.015	0.015	0.015	0.015	0.012	0.015	0.012	0.012	0.012	0.012	0.012	0.012	0.012	0.012	0.012	0.012	0.012	0.012	0.012	0.012	0.012	0.018	0.012	0.012	0.041	0.05	0.047	0.047	0.053	0.05	0.044	0.05	0.047	0.053	0.009	0.009	0.006	0.012	0.006	0.018	0.012	0.012	0.012	0.012
qui_CTMZ6916	0.05	0.05	0.101	0.101	0.012	0.012	0.012	0.012	0.012	0.009	0.012	0.009	0.009	0.009	0.009	0.009	0.009	0.009	0.009	0.009	0.009	0.009	0.009	0.009	0.009	0.009	0.015	0.009	0.009	0.038	0.047	0.044	0.044	0.05	0.047	0.041	0.047	0.044	0.05	0.006	0.006	0.009	0.009	0.009	0.015	0.009	0.009	0.009	0.009
qui_CTMZ6917	0.05	0.05	0.101	0.101	0.012	0.012	0.012	0.012	0.012	0.009	0.012	0.009	0.009	0.009	0.009	0.009	0.009	0.009	0.009	0.009	0.009	0.009	0.009	0.009	0.009	0.009	0.015	0.009	0.009	0.038	0.047	0.044	0.044	0.05	0.047	0.041	0.047	0.044	0.05	0.006	0.006	0.009	0.009	0.009	0.015	0.009	0.009	0.009	0.009
qui_LGA3267	0.053	0.053	0.099	0.099	0.015	0.015	0.015	0.015	0.015	0.012	0.015	0.012	0.012	0.012	0.012	0.012	0.012	0.012	0.012	0.012	0.012	0.012	0.012	0.012	0.012	0.012	0.018	0.012	0.012	0.041	0.05	0.047	0.047	0.053	0.05	0.044	0.05	0.047	0.053	0.009	0.009	0.012	0.012	0.012	0.018	0.012	0.012	0.012	0.012
sch_CFBH2078	0.023	0.023	0.096	0.096	0.047	0.047	0.047	0.047	0.047	0.044	0.047	0.044	0.044	0.044	0.044	0.044	0.044	0.044	0.044	0.044	0.044	0.044	0.044	0.044	0.044	0.044	0.047	0.044	0.044	0.009	0.018	0.015	0.015	0.015	0.018	0.009	0.015	0.012	0.018	0.038	0.038	0.041	0.035	0.041	0.05	0.035	0.041	0.041	0.041
sch_CFBH9060	0.02	0.02	0.093	0.093	0.047	0.047	0.047	0.047	0.047	0.044	0.047	0.044	0.044	0.044	0.044	0.044	0.044	0.044	0.044	0.044	0.044	0.044	0.044	0.044	0.044	0.044	0.047	0.044	0.044	0.006	0.015	0.012	0.012	0.012	0.015	0.006	0.012	0.009	0.015	0.038	0.038	0.041	0.035	0.041	0.05	0.035	0.041	0.041	0.041
sch_CTA1860	0.023	0.023	0.096	0.096	0.05	0.05	0.05	0.05	0.05	0.047	0.05	0.047	0.047	0.047	0.047	0.047	0.047	0.047	0.047	0.047	0.047	0.047	0.047	0.047	0.047	0.047	0.05	0.047	0.047	0.009	0.018	0.015	0.015	0.015	0.018	0.009	0.015	0.012	0.018	0.041	0.041	0.044	0.038	0.044	0.053	0.038	0.044	0.044	0.044
sch_CTA1887	0.02	0.02	0.093	0.093	0.047	0.047	0.047	0.047	0.047	0.044	0.047	0.044	0.044	0.044	0.044	0.044	0.044	0.044	0.044	0.044	0.044	0.044	0.044	0.044	0.044	0.044	0.047	0.044	0.044	0.006	0.015	0.012	0.012	0.012	0.015	0.006	0.012	0.009	0.015	0.038	0.038	0.041	0.035	0.041	0.05	0.035	0.041	0.041	0.041
sch_CTA1924	0.02	0.02	0.093	0.093	0.047	0.047	0.047	0.047	0.047	0.044	0.047	0.044	0.044	0.044	0.044	0.044	0.044	0.044	0.044	0.044	0.044	0.044	0.044	0.044	0.044	0.044	0.047	0.044	0.044	0.006	0.015	0.012	0.012	0.012	0.015	0.006	0.012	0.009	0.015	0.038	0.038	0.041	0.035	0.041	0.05	0.035	0.041	0.041	0.041
sch_CTMZ6906	0.02	0.02	0.093	0.093	0.047	0.047	0.047	0.047	0.047	0.044	0.047	0.044	0.044	0.044	0.044	0.044	0.044	0.044	0.044	0.044	0.044	0.044	0.044	0.044	0.044	0.044	0.047	0.044	0.044	0.006	0.015	0.012	0.012	0.012	0.015	0.006	0.012	0.009	0.015	0.038	0.038	0.041	0.035	0.041	0.05	0.035	0.041	0.041	0.041
sch_LGA2630	0.02	0.02	0.093	0.093	0.047	0.047	0.047	0.047	0.047	0.044	0.047	0.044	0.044	0.044	0.044	0.044	0.044	0.044	0.044	0.044	0.044	0.044	0.044	0.044	0.044	0.044	0.047	0.044	0.044	0.006	0.015	0.012	0.012	0.012	0.015	0.006	0.012	0.009	0.015	0.038	0.038	0.041	0.035	0.041	0.05	0.035	0.041	0.041	0.041
sch_MTR12266	0.02	0.02	0.093	0.093	0.047	0.047	0.047	0.047	0.047	0.044	0.047	0.044	0.044	0.044	0.044	0.044	0.044	0.044	0.044	0.044	0.044	0.044	0.044	0.044	0.044	0.044	0.047	0.044	0.044	0.006	0.015	0.012	0.012	0.012	0.015	0.006	0.012	0.009	0.015	0.038	0.038	0.041	0.035	0.041	0.05	0.035	0.041	0.041	0.041
sch_MTR17524	0.023	0.023	0.096	0.096	0.05	0.05	0.05	0.05	0.05	0.047	0.05	0.047	0.047	0.047	0.047	0.047	0.047	0.047	0.047	0.047	0.047	0.047	0.047	0.047	0.047	0.047	0.05	0.047	0.047	0.009	0.018	0.015	0.015	0.015	0.018	0.006	0.012	0.009	0.015	0.041	0.041	0.044	0.038	0.044	0.053	0.038	0.044	0.044	0.044
sch_MTR17571	0.023	0.023	0.096	0.096	0.05	0.05	0.05	0.05	0.05	0.047	0.05	0.047	0.047	0.047	0.047	0.047	0.047	0.047	0.047	0.047	0.047	0.047	0.047	0.047	0.047	0.047	0.05	0.047	0.047	0.009	0.018	0.015	0.015	0.015	0.018	0.006	0.012	0.009	0.015	0.041	0.041	0.044	0.038	0.044	0.053	0.038	0.044	0.044	0.044
shu_MW5645	0.139	0.139	0.133	0.133	0.139	0.137	0.137	0.139	0.137	0.134	0.137	0.134	0.134	0.134	0.134	0.134	0.134	0.134	0.134	0.134	0.134	0.134	0.134	0.134	0.134	0.134	0.142	0.134	0.134	0.139	0.142	0.139	0.139	0.145	0.142	0.139	0.145	0.142	0.148	0.136	0.136	0.139	0.134	0.139	0.136	0.134	0.139	0.139	0.139
ver_CFBH15818	0.06	0.06	0.112	0.112	0.027	0.027	0.027	0.027	0.027	0.024	0.027	0.024	0.024	0.024	0.024	0.024	0.024	0.024	0.024	0.024	0.024	0.024	0.024	0.024	0.024	0.024	0.024	0.024	0.024	0.048	0.057	0.054	0.054	0.06	0.057	0.051	0.057	0.054	0.057	0.021	0.021	0.024	0.024	0.024	0.03	0.024	0.024	0.024	0.024
ver_CTMZ6923	0.059	0.059	0.11	0.11	0.026	0.027	0.027	0.026	0.027	0.024	0.027	0.024	0.024	0.024	0.024	0.024	0.024	0.024	0.024	0.024	0.024	0.024	0.024	0.024	0.024	0.024	0.024	0.024	0.024	0.047	0.056	0.053	0.053	0.059	0.056	0.05	0.056	0.053	0.056	0.021	0.021	0.024	0.024	0.024	0.029	0.024	0.024	0.024	0.024
ver_CTMZ6924	0.059	0.059	0.11	0.11	0.026	0.026	0.026	0.026	0.026	0.024	0.026	0.024	0.024	0.024	0.024	0.024	0.024	0.024	0.024	0.024	0.024	0.024	0.024	0.024	0.024	0.024	0.023	0.024	0.024	0.047	0.056	0.053	0.053	0.059	0.056	0.05	0.056	0.053	0.056	0.021	0.021	0.023	0.023	0.023	0.029	0.023	0.023	0.023	0.023
ver_CTMZ6925	0.059	0.059	0.11	0.11	0.026	0.026	0.026	0.026	0.026	0.024	0.026	0.024	0.024	0.024	0.024	0.024	0.024	0.024	0.024	0.024	0.024	0.024	0.024	0.024	0.024	0.024	0.023	0.024	0.024	0.047	0.056	0.053	0.053	0.059	0.056	0.05	0.056	0.053	0.056	0.021	0.021	0.023	0.023	0.023	0.029	0.023	0.023	0.023	0.023
ver_CTMZ6927	0.059	0.059	0.11	0.11	0.026	0.027	0.027	0.026	0.027	0.024	0.027	0.024	0.024	0.024	0.024	0.024	0.024	0.024	0.024	0.024	0.024	0.024	0.024	0.024	0.024	0.024	0.024	0.024	0.024	0.047	0.056	0.053	0.053	0.059	0.056	0.05	0.056	0.053	0.056	0.021	0.021	0.024	0.024	0.024	0.029	0.024	0.024	0.024	0.024
ver_CTMZ6929	0.059	0.059	0.11	0.11	0.026	0.026	0.026	0.026	0.026	0.024	0.026	0.024	0.024	0.024	0.024	0.024	0.024	0.024	0.024	0.024	0.024	0.024	0.024	0.024	0.024	0.024	0.023	0.024	0.024	0.047	0.056	0.053	0.053	0.059	0.056	0.05	0.056	0.053	0.056	0.021	0.021	0.023	0.023	0.023	0.029	0.023	0.023	0.023	0.023
ver_CTMZ6930	0.059	0.059	0.11	0.11	0.026	0.026	0.026	0.026	0.026	0.024	0.026	0.024	0.024	0.024	0.024	0.024	0.024	0.024	0.024	0.024	0.024	0.024	0.024	0.024	0.024	0.024	0.023	0.024	0.024	0.047	0.056	0.053	0.053	0.059	0.056	0.05	0.056	0.053	0.056	0.021	0.021	0.023	0.023	0.023	0.029	0.023	0.023	0.023	0.023
ver_CTMZ6932	0.059	0.059	0.11	0.11	0.026	0.026	0.026	0.026	0.026	0.024	0.026	0.024	0.024	0.024	0.024	0.024	0.024	0.024	0.024	0.024	0.024	0.024	0.024	0.024	0.024	0.024	0.023	0.024	0.024	0.047	0.056	0.053	0.053	0.059	0.056	0.05	0.056	0.053	0.056	0.021	0.021	0.023	0.023	0.023	0.029	0.023	0.023	0.023	0.023
ver_CTMZ6933	0.059	0.059	0.11	0.11	0.026	0.027	0.027	0.026	0.027	0.024	0.027	0.024	0.024	0.024	0.024	0.024	0.024	0.024	0.024	0.024	0.024	0.024	0.024	0.024	0.024	0.024	0.024	0.024	0.024	0.047	0.056	0.053	0.053	0.059	0.056	0.05	0.056	0.053	0.056	0.021	0.021	0.024	0.024	0.024	0.029	0.024	0.024	0.024	0.024
ver_CTMZ6935	0.059	0.059	0.11	0.11	0.026	0.026	0.026	0.026	0.026	0.024	0.026	0.024	0.024	0.024	0.024	0.024	0.024	0.024	0.024	0.024	0.024	0.024	0.024	0.024	0.024	0.024	0.023	0.024	0.024	0.047	0.056	0.053	0.053	0.059	0.056	0.05	0.056	0.053	0.056	0.021	0.021	0.023	0.023	0.023	0.029	0.023	0.023	0.023	0.023
[truncated: 52 more columns]
